# Supplementary material
Source: HighWire-hosted journal article supplement (http://www.ajnr.org/highwire/filestream/52136/field_highwire_adjunct_files/0/1714_table.pdf)
Supplement: 1714_table.pdf [file 1714_table.pdf]

**On-line Table: Frequency of clinical and MRI characteristics in patients with hypophysitis (*n* = 304) or nonsecreting pituitary macroadenoma (*n* = 98)**

| Predictor: Clinical Data and MRI Features | Hypophysitis |      | Nonsecreting Adenoma |      | $\beta^*$ | Pt     |
|-------------------------------------------|--------------|------|----------------------|------|-----------|--------|
|                                           | No.          | (%)  | No.                  | (%)  |           |        |
| Sex                                       |              |      |                      |      |           |        |
| Female                                    | 214          | (70) | 40                   | (41) | -1.68     | <.0001 |
| Male                                      | 90           | (30) | 58                   | (59) | 1.24      | <.0001 |
| Age (yr)                                  |              |      |                      |      |           |        |
| $\leq 30$                                 | 92           | (30) | 3                    | (3)  | -1.18     | <.0001 |
| 31-59                                     | 167          | (55) | 51                   | (52) | -2.24     | <.0001 |
| $\geq 60$                                 | 45           | (15) | 44                   | (45) | 1.16      | <.0001 |
| Relation to pregnancy                     |              |      |                      |      |           |        |
| Yes                                       | 64           | (21) | 1                    | (1)  | -2.49     | .016   |
| No                                        | 121          | (40) | 23                   | (24) |           |        |
| Not applicable                            | 119          | (39) | 74                   | (75) |           |        |
| Pituitary volume                          |              |      |                      |      |           |        |
| $< 6 \text{ cm}^3$                        | 80           | (76) | 21                   | (23) | -1.34     | <.0001 |
| $\geq 6 \text{ cm}^3$                     | 25           | (24) | 72                   | (77) | 2.39      | <.0001 |
| Adenohypophysitis                         |              |      |                      |      |           |        |
| T1 signal intensity                       |              |      |                      |      |           |        |
| Isointense                                | 110          | (69) | 17                   | (41) | -1.87     | <.0001 |
| Hyperintense                              | 15           | (9)  | 14                   | (33) | 1.79      | <.0001 |
| Hypointense                               | 35           | (22) | 11                   | (26) | 0.71      | NS     |
| Homogeneity                               |              |      |                      |      |           |        |
| Homogeneous                               | 139          | (79) | 15                   | (35) | -2.23     | <.0001 |
| Heterogeneous                             | 23           | (13) | 22                   | (51) | 2.18      | <.0001 |
| Centrally hypointense                     | 14           | (8)  | 6                    | (14) | 1.38      | .013   |
| Gd enhancement intensity                  |              |      |                      |      |           |        |
| Low                                       | 45           | (17) | 21                   | (55) | -0.76     | .04    |
| High                                      | 218          | (73) | 17                   | (45) | -1.79     | <.0001 |
| Gd enhancement homogeneity                |              |      |                      |      |           |        |
| Homogeneous                               | 157          | (78) | 24                   | (36) | -1.88     | <.0001 |
| Heterogeneous                             | 20           | (10) | 31                   | (47) | 2.31      | <.0001 |
| Centrally hypointense                     | 24           | (12) | 11                   | (17) | 1.09      | .010   |
| Symmetry                                  |              |      |                      |      |           |        |
| Symmetric                                 | 207          | (95) | 2                    | (3)  | -4.64     | <.0001 |
| Asymmetric                                | 12           | (5)  | 64                   | (97) | 6.28      | <.0001 |
| Neurohypophysis and stalk                 |              |      |                      |      |           |        |
| Posterior pituitary bright spot           |              |      |                      |      |           |        |
| Conserved                                 | 185          | (61) | 95                   | (97) |           |        |
| Lost                                      | 78           | (26) | 3                    | (3)  | -2.59     | <.0001 |
| Stalk size                                |              |      |                      |      |           |        |
| Normal                                    | 83           | (32) | 97                   | (99) | 0.18      | NS     |
| Enlarged                                  | 182          | (68) | 1                    | (1)  | -5.36     | <.0001 |
| Stalk Gd enhancement                      |              |      |                      |      |           |        |
| Normal isointense                         | 96           | (37) | 77                   | (99) | -0.22     | NS     |
| Increased                                 | 167          | (63) | 1                    | (1)  | -4.9      | <.0001 |
| Hypothalamus involvement                  |              |      |                      |      |           |        |
| Absent                                    | 33           | (45) | 10                   | (53) | -1.19     | NS     |
| Present                                   | 40           | (55) | 9                    | (47) | -0.29     |        |
| Dural tail sign                           |              |      |                      |      |           |        |
| Absent                                    | 232          | (88) | 69                   | (88) | -1.22     | NS     |
| Present                                   | 31           | (12) | 9                    | (12) | 0.03      |        |
| Parasellar features                       |              |      |                      |      |           |        |
| Mucosal thickening                        |              |      |                      |      |           |        |
| Absent                                    | 282          | (94) | 76                   | (78) | -1.32     | <.0001 |
| Present                                   | 17           | (6)  | 22                   | (22) | 1.58      | <.0001 |
| Sellar floor erosion                      |              |      |                      |      |           |        |
| Absent                                    | 29           | (55) | 12                   | (24) | -0.88     | .010   |
| Present                                   | 24           | (45) | 37                   | (76) | 1.31      | .002   |
| Extrasellar features                      |              |      |                      |      |           |        |
| Cavernous sinus invasion                  |              |      |                      |      |           |        |
| Absent                                    | 33           | (49) | 56                   | (57) | 0.53      | 0.016  |
| Present                                   | 35           | (51) | 42                   | (43) | -0.35     | NS     |
| Visual pathway involvement                |              |      |                      |      |           |        |
| Absent                                    | 79           | (40) | 10                   | (11) | -2.06     | <.0001 |
| Present                                   | 119          | (60) | 84                   | (89) | 1.72      | <.0001 |
| Internal carotid artery involvement       |              |      |                      |      |           |        |
| Absent                                    | 22           | (69) | 85                   | (93) | 1.35      | <.0001 |
| Present                                   | 10           | (31) | 6                    | (7)  | -1.86     | <.001  |

**Note:**—MRI indicates MR imaging; Gd, gadolinium; NS, not significant.

\* Regression coefficient of the univariate logistic analysis that regressed diagnosis on each separate covariate. P value from these regressions.
